# Supplementary material
Source: PubMed Central journal article supplement (PMC6249058)
Supplement: NIHMS1508207-supplement-1.pdf [file NIHMS1508207-supplement-1.pdf]

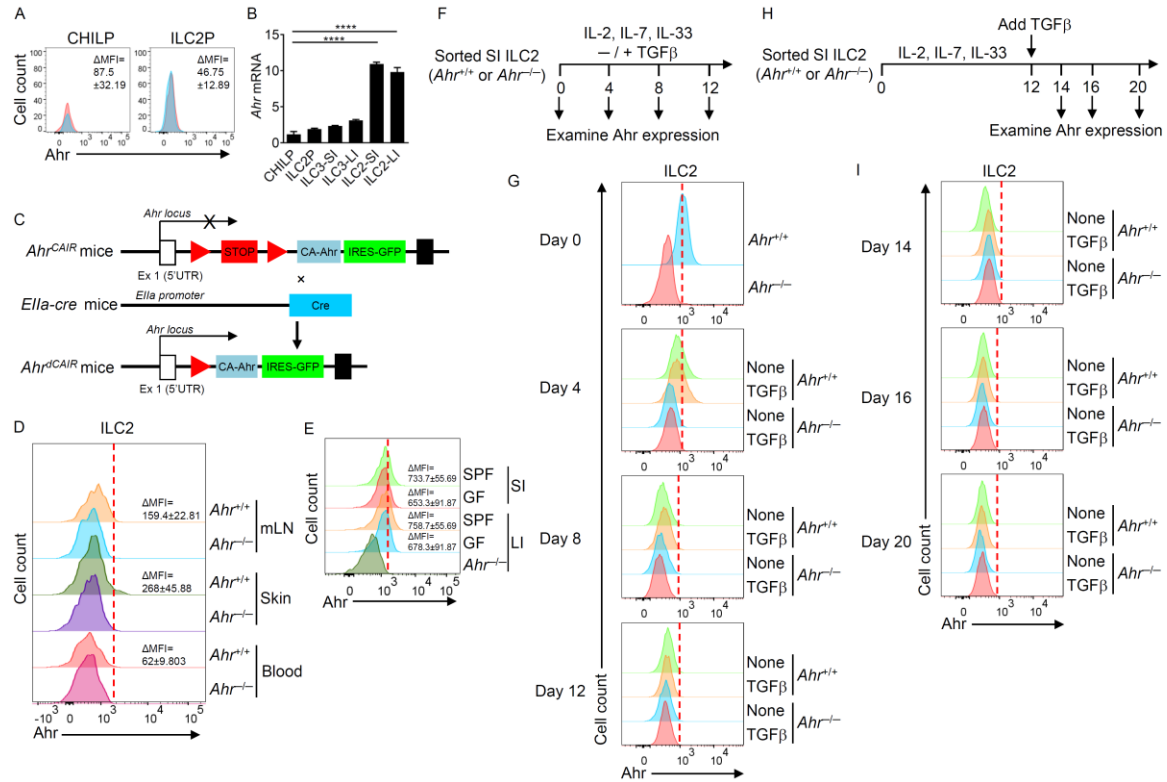

**Supplemental Figure 1. Ahr expression in ILC progenitors and mature ILCs, and the effect of TGFβ on Ahr expression, (Related to Figure 1).**

(A) FACS analysis of Ahr expression in CHILP ( $\text{Lin}^- \text{CD127}^+ \alpha 4\beta 7^+ \text{CD25}^- \text{Flt3}^-$ ), and ILC2P ( $\text{Lin}^- \text{CD127}^+ \alpha 4\beta 7^+ \text{CD25}^+ \text{Flt3}^-$ ) from the bone marrow of  $Ahr^{-/-}$  or  $Ahr^{+/+}$  littermate mice.  $\Delta\text{MFI}$  (Mean Fluorescence Intensity) was calculated as follows:  $\text{MFI of indicated } Ahr^{+/+} \text{ cell populations} - \text{MFI of indicated } Ahr^{-/-} \text{ cell populations}$ . Data are representative of three independent experiments. (B) CHILP, ILC2P, ILC2s ( $\text{Lin}^- \text{KLRG1}^+ \text{CD90}^+$ ), and ILC3s ( $\text{Lin}^- \text{CD45}^{\text{low}} \text{CD90}^+$ ) were sorted from wildtype C57/BL6 mice. *Ahr* mRNA was analyzed by realtime RT-PCR. Data are shown as mean  $\pm$  SEM (n=3). ANOVA followed by Bonferroni's test for ILC2s in the small intestine (SI) or large intestine (LI) versus other subsets. \*\*\*\*p<0.0001. (C) Representation of the knock-in mouse model of *Ahr*<sup>CAIR</sup> mice with Cre-controlled expression of Ahr $\Delta$ PAS-B (CA-Ahr) and the generation of *Ahr*<sup>dCAIR</sup> mice by

crossing *Ahr*<sup>CAIR/+</sup> mice with *EIIa-cre* mice to delete the loxP-flanked STOP sequence in the germline, and subsequent removal of the *EIIa-cre* transgene by breeding. (D) FACS analysis of Ahr expression in ILC2s from indicated organs. Data are shown as mean  $\pm$  SEM (n=5 per group).  $\Delta$ MFI was calculated as follows: MFI of indicated *Ahr*<sup>+/+</sup> ILC2 populations – MFI of corresponding *Ahr*<sup>-/-</sup> ILC2s from the same source. (E) FACS analysis of Ahr expression in SI or LI ILC2s (Lin<sup>-</sup>GATA3<sup>+</sup>) of specific pathogen free (SPF) or germ-free (GF) mice. Data are shown as mean  $\pm$  SEM (n=3 per group).  $\Delta$ MFI was calculated as follows: MFI of indicated ILC2 populations – MFI of *Ahr*<sup>-/-</sup> SPF LI ILC2s. (F and G) SI ILC2s were sorted from *Ahr*<sup>+/+</sup> or *Ahr*<sup>-/-</sup> littermate mice. The cells were then cultured in presence of IL-2, IL-7 and IL-33 (10 ng/ml each), with or without TGF $\beta$  (10 ng/ml). ILC2s were collected at indicated time points and intracellular Ahr was determined. Schematic depiction of the experiment (F). FACS analysis of Ahr in *Ahr*<sup>+/+</sup> or *Ahr*<sup>-/-</sup> ILC2s from indicated time points (G). (H and I) Sorted SI ILC2s were cultured in presence of IL-2, IL-7 and IL-33 (10 ng/ml each) for 12 days. TGF $\beta$  (10 ng/ml) was added on day 12, and ILC2s were harvested at indicated time points. Schematic depiction of the experiment (H). FACS analysis of Ahr in *Ahr*<sup>+/+</sup> or *Ahr*<sup>-/-</sup> ILC2s from indicated time points (I).

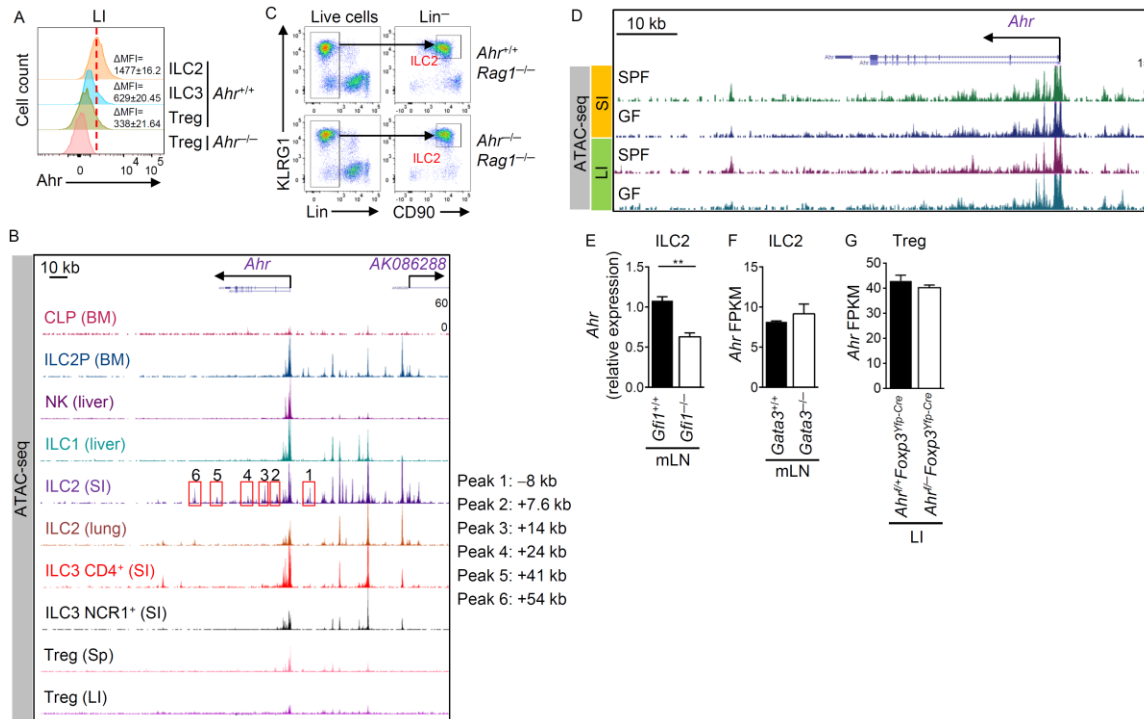

**Supplemental Figure 2. Chromatin accessibility at the *Ahr* locus in ILC progenitors, mature ILCs, and Treg cells, (Related to Figure 1).** (A) Intracellular staining of Ahr in ILC2s ( $\text{Lin}^- \text{GATA3}^+ \text{ROR}\gamma\text{t}^-$ ), ILC3s ( $\text{Lin}^- \text{ROR}\gamma\text{t}^+ \text{GATA3}^-$ ), and Treg cells ( $\text{Lin}^+ \text{Foxp3}^+$ ) isolated from the lamina propria of large intestine (LI). Data are shown as mean  $\pm$  SEM (n=5 per group).  $\Delta$ MFI was calculated as follows: MFI of indicated populations – MFI of corresponding population from *Ahr*<sup>-/-</sup> mice. (B) Representative ATAC-seq signals at the *Ahr* locus in indicated cell populations. Analysis is based on published ATAC-seq data (Shih et al., 2016; Ye et al., 2017). Red boxes highlight the gut ILC2-specific peaks with indicated distance downstream or upstream from the transcription start site. (C) Sorting strategy of ILC2s from the gut. (D) Representative ATAC-seq signals at the *Ahr* locus in gut ILC2s ( $\text{Lin}^- \text{KLRG1}^+ \text{CD90}^+$ ) of SPF or GF C57/BL6 wildtype mice. (E) Relative *Ahr* expression in the mesenteric lymph nodes (mLN) of *Gfi1*-sufficient or deficient ILC2s analyzed from published microarray data (Spooner et al., 2013). (F) Fragments Per Kilobase of transcript per Million mapped reads (FPKM) of

Ahr in RNA-seq with sorted ILC2s from mLN of *Gata3<sup>fl/fl</sup>-CreERT2* mice, and treated with or without 4-Hydroxytamoxifen (OHT) (Yagi et al., 2014). (G) FPKM of Ahr in RNA-seq from Treg cells sorted from LI of *Ahr<sup>f/+</sup>Foxp3<sup>Yfp-Cre</sup>* or *Ahr<sup>f/-</sup>Foxp3<sup>Yfp-Cre</sup>* littermate mice (Ye et al., 2017)

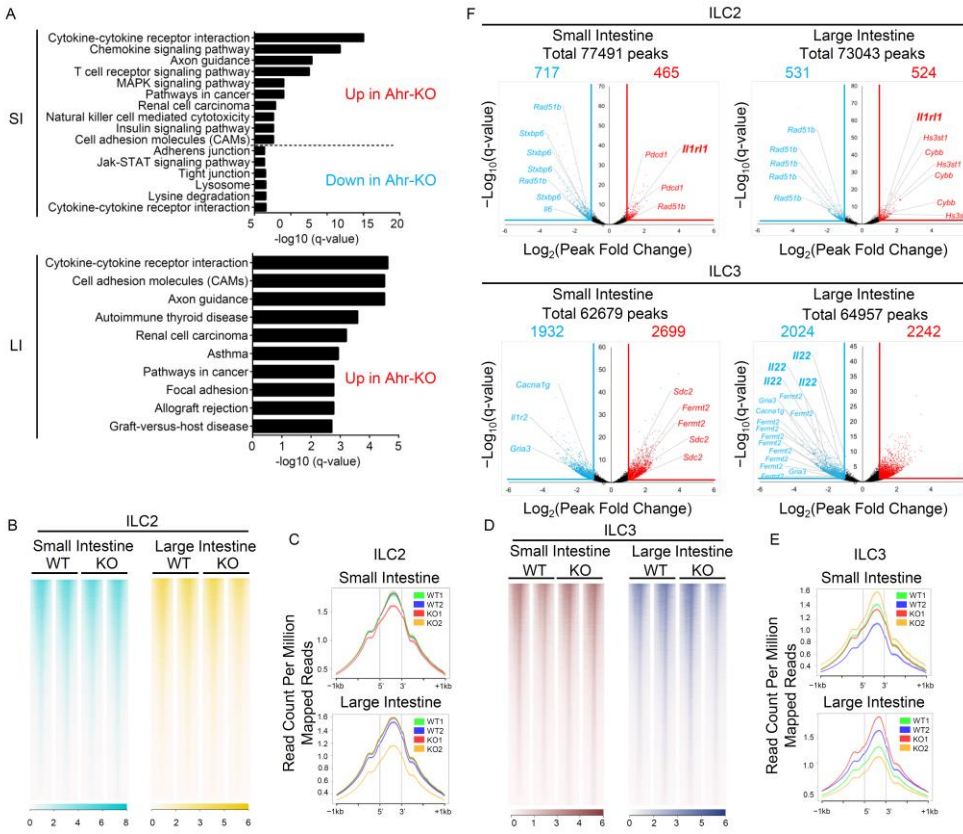

**Supplemental Figure 3. Ahr regulates specific gene pathways and chromatin remodeling events in ILCs, (Related to Figure 2).** (A) Pathway analysis of differentially-expressed genes identified by RNA-seq in ILC2s (q-value  $\leq 0.05$ ) from the small intestine (SI) and large intestine (LI) of *Ahr*<sup>+/+</sup>*Rag1*<sup>-/-</sup> (WT) or littermate *Ahr*<sup>-/-</sup>*Rag1*<sup>-/-</sup> (KO) mice. (B, D) ATAC-seq signal across all peak locations comparing ILC2s or ILC3s from SI and LI of *Ahr*<sup>+/+</sup>*Rag1*<sup>-/-</sup> (WT) or *Ahr*<sup>-/-</sup>*Rag1*<sup>-/-</sup> (KO) littermate mice. (C, E) Average ATAC-seq peak signal (Reads Per Million mapped reads; RPM) centered on all peak locations (signal is calculated from 5' to 3' end of the peaks  $\pm 1$ kb) of ILC2s or ILC3s. (F) Volcano plots indicating fold changes between *Ahr*<sup>+/+</sup>*Rag1*<sup>-/-</sup> (WT) and littermate *Ahr*<sup>-/-</sup>*Rag1*<sup>-/-</sup> (KO) ILC2s or ILC3s in ATAC-seq signals and q-value. Differentially-expressed peaks (RPM  $\geq 1$ , q-value  $\leq 0.05$ , and fold change  $\geq 2$ ) are highlighted in blue (decreased in KO) or red (increased in KO). The differential peaks at the ILC2- or ILC3-characteristic or -associated gene loci were annotated.

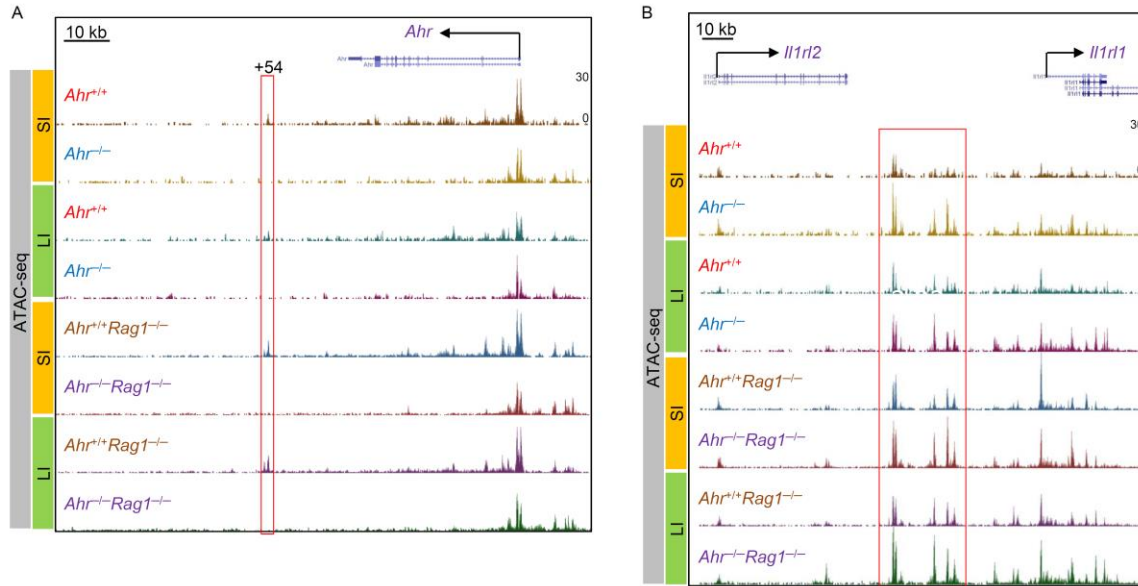

**Supplemental Figure 4. The regulation of chromatin at the *Ahr* and *Il1rl1* loci by Ahr is independent of adaptive immunity, (Related to Figure 2).** Representative ATAC-seq tracks at the *Ahr* (A) and *Il1rl1* (B) loci in ILC2s sorted from the small intestine (SI) or large intestine (LI) of *Ahr*<sup>+/+</sup> or *Ahr*<sup>-/-</sup> littermate mice, or *Ahr*<sup>+/+</sup> *Rag1*<sup>-/-</sup> or *Ahr*<sup>-/-</sup> *Rag1*<sup>-/-</sup> littermate mice.

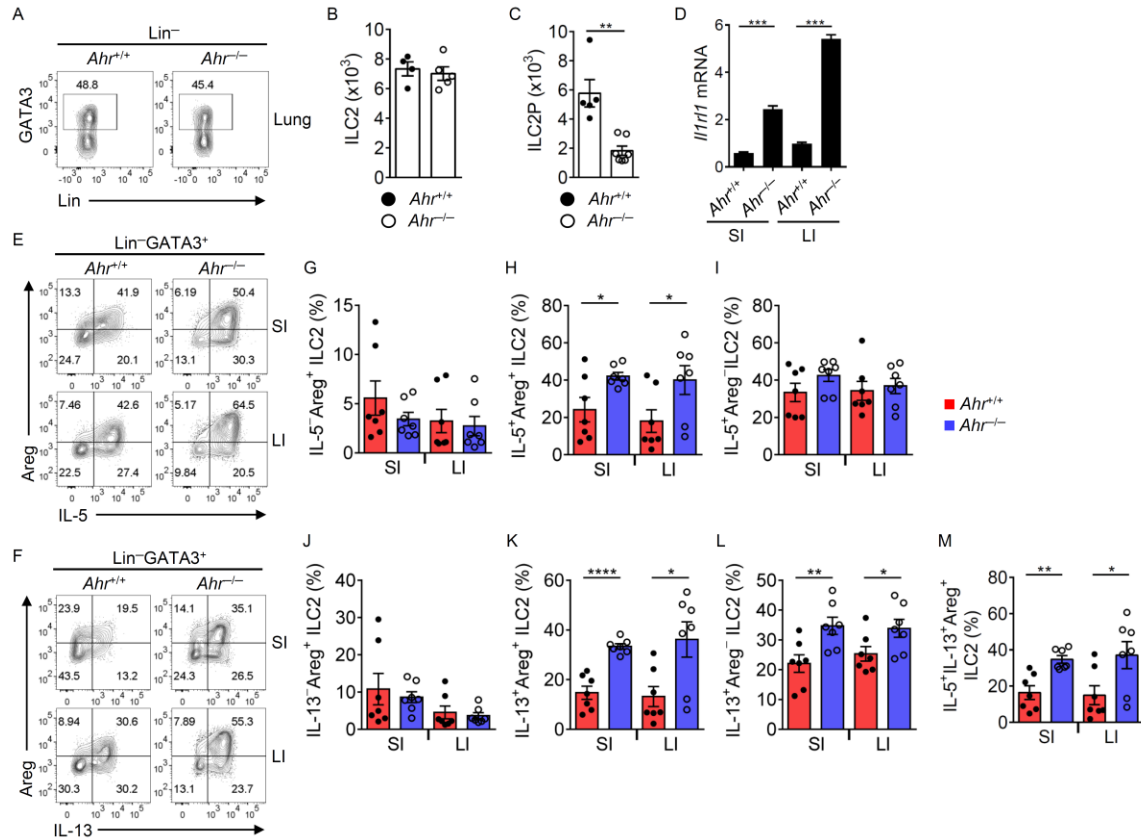

**Supplemental Figure 5. Enhanced ST2, IL-5, IL-13, and Amphiregulin expression in *Ahr*-deficient ILC2s, (Related to Figure 3).** (A) FACS analysis of GATA3 expression after gating on  $\text{Lin}^-$  cells in the lung of *Ahr*<sup>+/+</sup> or *Ahr*<sup>-/-</sup> littermate mice. Data are representative of two independent experiments. (B) Absolute numbers of ILC2s ( $\text{Lin}^- \text{GATA3}^+$ ) in the lung of *Ahr*<sup>+/+</sup> or *Ahr*<sup>-/-</sup> littermate mice. Data are shown as mean  $\pm$  SEM (n=4-5 per group). (C) Absolute numbers of ILC2P ( $\text{Lin}^- \text{CD127}^+ \alpha 4\beta 7^+ \text{CD25}^+ \text{Flt3}^-$ ) in the bone marrow of *Ahr*<sup>+/+</sup> or *Ahr*<sup>-/-</sup> littermate mice. Data are shown as mean  $\pm$  SEM (n=5-7 per group). (D) mRNA of ST2 (*Il1rl1*) was determined by realtime RT-PCR. Data are shown as mean  $\pm$  SEM (n=3). (E to M) FACS analyses of IL-5 and amphiregulin (Areg) expression (E), and IL-13 and Areg expression (F) after gating on  $\text{Lin}^- \text{GATA3}^+$  lamina propria lymphocytes (LPLs) in the small intestine (SI) and large intestine (LI) of *Ahr*<sup>+/+</sup> or *Ahr*<sup>-/-</sup> littermate mice. Data are representative of three independent experiments. (G to

M) Percentages of indicated subsets in ILC2s ( $\text{Lin}^- \text{GATA3}^+$ ) in SI and LI of *Ahr*<sup>+/+</sup> or *Ahr*<sup>-/-</sup> littermate mice. Data are shown as mean  $\pm$  SEM (n=7 per group).



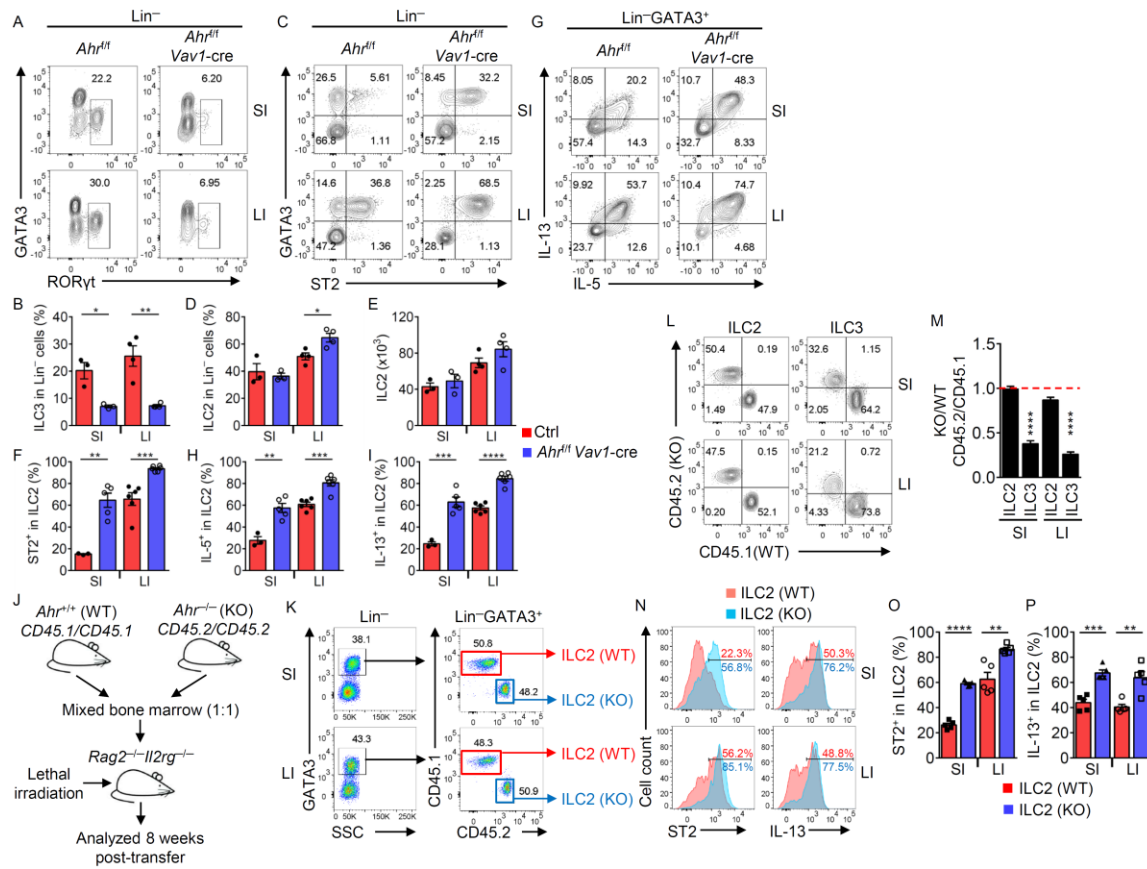

**Supplemental Figure 6. Hematopoietic cell-intrinsic regulation of ILC2s by Ahr, (Related to Figure 4).** (A to I) FACS analyses of RORγt and GATA3 (A), ST2 and GATA3 expression (C) after gating on Lin<sup>-</sup> cells, and IL-5 and IL-13 expression after gating on Lin<sup>-</sup>GATA3<sup>+</sup> cells (G) in the small intestine (SI) and large intestine (LI) of *Ahr<sup>fl/fl</sup>* and *Ahr<sup>fl/fl</sup> Vav1-cre* littermate mice. Data are representative of three independent experiments. Percentages of ILC3s (Lin<sup>-</sup>RORγt<sup>+</sup>) (B), ILC2s (Lin<sup>-</sup>GATA3<sup>+</sup>) (D) among Lin<sup>-</sup> cells, and ST2<sup>+</sup> cells in ILC2s (F) in SI and LI of Ctrl (*Ahr<sup>fl/fl</sup>* or *Ahr<sup>fl/fl</sup>*) and *Ahr<sup>fl/fl</sup> Vav1-cre* littermate mice. Absolute numbers of ILC2s (E). Data are shown as mean ± SEM (n=3-6 per group). Percentages of IL-5<sup>+</sup> (H), and IL-13<sup>+</sup> (I) cells in ILC2s (Lin<sup>-</sup>GATA3<sup>+</sup>) in SI and LI of Ctrl (*Ahr<sup>fl/fl</sup>* or *Ahr<sup>fl/fl</sup>*) and *Ahr<sup>fl/fl</sup> Vav1-cre* littermate mice. Data are shown as mean ± SEM (n=3-6 per group). (J to P) Bone marrow from *Ahr<sup>+/+</sup>* (WT, CD45.1/CD45.1) or *Ahr<sup>-/-</sup>* (KO, CD45.2/CD45.2) age and sex matched mice were mixed at equal

ratio, and transferred into lethally irradiated *Rag2<sup>-/-</sup>Il2rg<sup>-/-</sup>* littermate recipient mice. Experimental design of competitive bone marrow chimera (J), and FACS analyses of SSC and GATA3 after gating on Lin<sup>-</sup> cells, and CD45.2 and CD45.1 expression by bone marrow-derived ILC2s (Lin<sup>-</sup>GATA3<sup>+</sup>) in the small intestine (SI) or large intestine (LI) of recipient mice (K). (L) FACS analysis of CD45.1 and CD45.2 expression by bone marrow-derived ILC2s (Lin<sup>-</sup>GATA3<sup>+</sup>), and ILC3s (Lin<sup>-</sup>RORγt<sup>+</sup>) in SI and LI of recipient bone marrow chimeric mice. (M) Ratio of KO (*Ahr<sup>-/-</sup>*) (CD45.2/CD45.2) and WT (*Ahr<sup>+/+</sup>*) (CD45.1/CD45.1) bone marrow-derived ILC2s and ILC3s in competitive bone marrow chimera. Data are shown as mean ± SEM (n=5 per group). Dotted line indicates ratio 1. (N) FACS analysis of ST2 or IL-13 expression by ILC2s (Lin<sup>-</sup>GATA3<sup>+</sup>) derived from the bone marrow of *Ahr<sup>+/+</sup>* (WT) or *Ahr<sup>-/-</sup>* (KO). Data are representative of five recipient mice. Percentages of ST2<sup>+</sup> (O) and IL-13<sup>+</sup> (P) cells in the indicated ILC2s. Data are shown as mean ± SEM (n=5 per group).

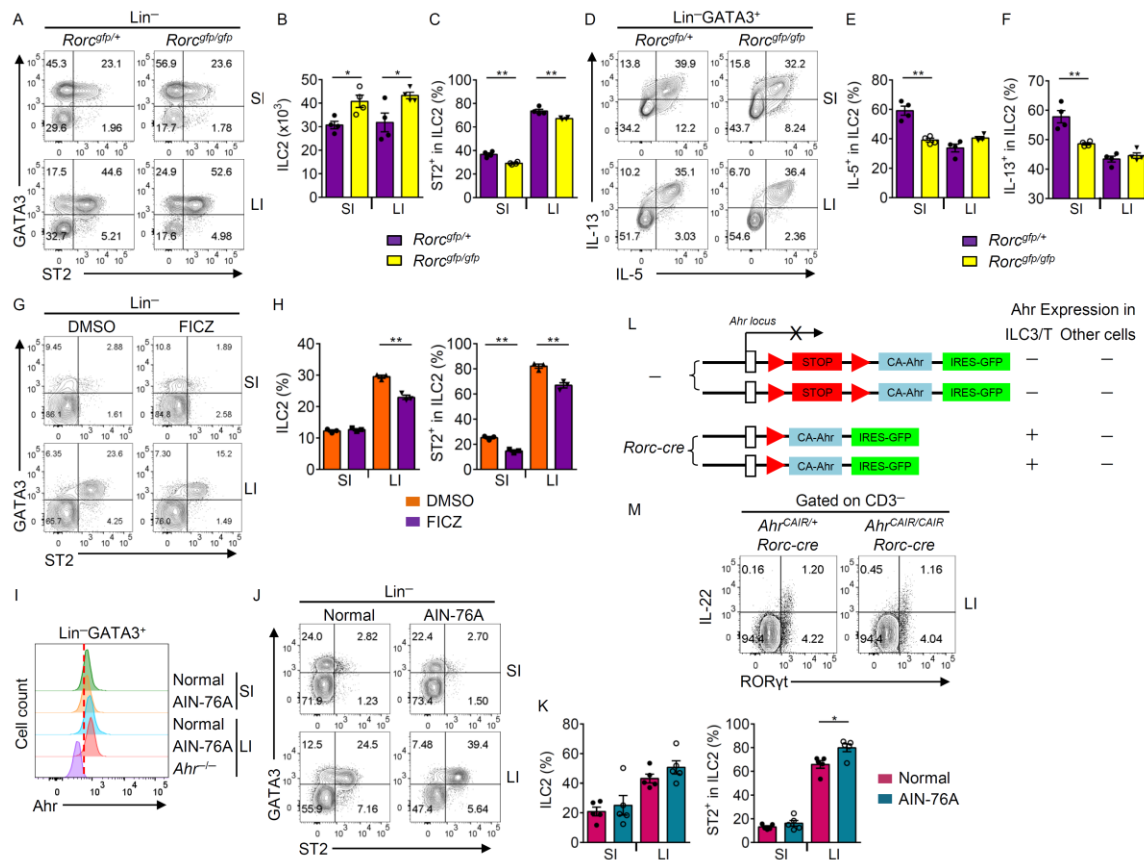

**Supplemental Figure 7. Impact of ILC3s deficiency on ILC2s, and regulation of ILCs by ligand or genetic modulation of Ahr activity, (Related to Figures 4 and 7).** (A to F) FACS analyses of ST2 and GATA3 after gating on Lin<sup>-</sup> lamina propria lymphocytes (LPLs) (A), and IL-5 and IL-13 expression after gating on Lin<sup>-</sup>GATA3<sup>+</sup> LPLs (D) in the small intestine (SI) and large intestine (LI) of *Rorc<sup>gfp/+</sup>* or *Rorc<sup>gfp/gfp</sup>* littermate mice. Data are representative of two independent experiments. Absolute number of ILC2s (B), and percentages of ST2<sup>+</sup> (C), IL-5<sup>+</sup> (E), and IL-13<sup>+</sup> (F) cells in ILC2s (Lin<sup>-</sup>GATA3<sup>+</sup>) in SI and LI of *Rorc<sup>gfp/+</sup>* or *Rorc<sup>gfp/gfp</sup>* littermate mice. Data are shown as mean ± SEM (n=4 per group). (G and H) FACS analysis of ST2 and GATA3 expression after gating on Lin<sup>-</sup> lamina propria lymphocytes (LPLs) of littermate wildtype 6 day-old mice treated with FICZ (0.5 μg/day) or vehicle DMSO for 7 days (G). Data are representative of two independent experiments. (H) Percentages of ILC2s (Lin<sup>-</sup>GATA3<sup>+</sup>) in

Lin<sup>-</sup> LPLs, and ST2<sup>+</sup> cells in ILC2s (Lin<sup>-</sup>GATA3<sup>+</sup>) in the small intestine (SI) and large intestine (LI). Data are shown as mean ± SEM (n=4 per group). FACS analyses of Ahr expression after gating on Lin<sup>-</sup>GATA3<sup>+</sup> cells (I), and ST2 and GATA3 expression after gating on Lin<sup>-</sup> LPLs (J) of littermate wildtype mice fed with Ahr ligand-deficient diet (AIN-76A) (see STAR Methods). Data are representative of two independent experiments. (K) Percentages of ILC2s (Lin<sup>-</sup>GATA3<sup>+</sup>) in Lin<sup>-</sup> LPLs, and ST2<sup>+</sup> cells in ILC2s (Lin<sup>-</sup>GATA3<sup>+</sup>) in SI and LI. Data are shown as mean ± SEM (n=5 per group). (L) Schematic depiction of generation of *Ahr*<sup>CAIR/CAIR</sup> *Rorc-cre* mice and Ahr expression in indicated cell populations. (M) FACS analysis of IL-22 and RORγt expression gated on CD3<sup>-</sup> LI LPLs of indicated littermate mice. Data are representative of two independent experiments.

Table S1. Primers for realtime RT-PCR and ChIP assays, (Related to STAR Methods)

|                             |                            |
|-----------------------------|----------------------------|
| <i>Actin</i> FW             | CTTCTTTGCAGCTCCTTCGTT      |
| <i>Actin</i> RV             | AGGAGTCCTTCTGACCCATTC      |
| <i>Ahr</i> FW               | GGCTTTCAGCAGTCTGATGTC      |
| <i>Ahr</i> RV               | CATGAAAGAAGCGTTCTCTGG      |
| <i>Il1rl1</i> FW            | TGACGGCCACCAGATCATTACACAG  |
| <i>Il1rl1</i> RV            | GCCAAAGCAAGCTGAACAGGCAATAC |
| <i>Gfi1</i> FW              | AGCGTCGGAGAAGTCACTGT       |
| <i>Gfi1</i> RV              | CAGGTCAGACCCAGCAAGAC       |
| <i>Relmb</i> FW             | TGGTGGATCAAAGGATCAAG       |
| <i>Relmb</i> RV             | CCACAAGCACATCCAGTGAC       |
| ChIP <i>Ahr</i> +54kb FW    | CCTCCAGTGACACGCAAGTA       |
| ChIP <i>Ahr</i> +54kb RV    | CCATCCAGTCTCCACCAGTT       |
| ChIP <i>Ahr</i> +14kb FW    | CCTTGACCCAACAAGAGTGAA      |
| ChIP <i>Ahr</i> +14kb RV    | TGGAGTCAGCAGTTGACAGG       |
| ChIP <i>Il1rl1</i> -11kb FW | ACTTATCTAACCCCTCCTCACCC    |
| ChIP <i>Il1rl1</i> -11kb RV | AAGTAGCAGCCTGTCTGAACTAC    |
| ChIP <i>Il1rl1</i> -2kb FW  | AGGGTAGAGTCATAGGCCAAC      |
| ChIP <i>Il1rl1</i> -2kb RV  | TGTGATAGTCTTTCCTCGTGAGC    |
